# Supplementary material for: A quantitative investigation of linker histone interactions with nucleosomes and chromatin
Source: PubMed Central journal article supplement (PMC4707517; doi:10.1038/srep19122), 2016-01-11
Supplement: srep19122-s1.pdf [file srep19122-s1.pdf]

*A quantitative investigation of linker histone interactions with  
nucleosomes and chromatin*

<sup>1</sup>Alison E. White, Aaron R. Hieb, and <sup>1</sup>Karolin Luger

**Supplementary Figures:****Supplementary Figure 1: Validation of FRET and competition assays**

a) 5% native PAGE of samples taken from a HI-FI competition experiment between S31/30 (10 nM) and A1/10 (0-500 nM), for H1<sub>FL</sub> (1 nM). The gel was visualized at the indicated wavelengths, then stained with ethidium bromide. Lanes 1-6 are H1<sub>FL</sub> with decreasing amounts of A1/10 (500, 62.5, 15.6, 1.95, 0.244, 0.0305 nM, respectively). Lane 7 is S31/30 Atto647N nucleosome alone. Donor signal with H1<sub>FL</sub> remains with S31/30 nucleosome as more A1/10 nucleosome competitor is added (lanes 1-6: middle gel) indicating that A1/10 nucleosome is unable to compete H1<sub>FL</sub> from the S31/30 nucleosome.

b) Representative (de)quenching curves of S30/30 nucleosome with the H2A.Z histone variant (S30/30.z) reconstituted with mouse histones, to measure the interaction with H1\*<sub>FL</sub>. H1<sub>FL</sub> was held constant at 0.08-0.1 nM and S30/30.z nucleosome was titrated (0-25 nM). Curves were fit with a quadratic equation (*Eq. 3*).

c) Representative (de)quenching curve of NLE-Tri (NLE-Tri.z) nucleosome with the H2A.z histone variant containing mouse histones, upon binding to H1\*<sub>FL</sub>. H1<sub>FL</sub> was held constant at 0.08-0.1 nM and NLE-Tri.z nucleosome was titrated (0-25 nM). Curves were fit with *Eq. 3*.

**Supplementary Figure 2: Analysis of NLE-Tri – H1 complexes by Atomic Force Microscopy**

NLE-Tri was imaged with AFM alone or in presence of H1<sub>FL</sub> (molar ratio of 1 H1 per 1 NLE-Tri array).

a) Digital zooms of AFM scan with example height trace(s) of NLE-Tri alone (left) or with H1<sub>FL</sub> (right). Height increases 1.3 to 1.9 nm when H1<sub>FL</sub> is present.

b) Upper two panels: Digital zoom of scans of NLE-Tri alone showing the open geometry of the trinucleosome. Lower two panels: Digital zoom of scans of NLE-Tri in the presence of H1<sub>FL</sub> depicting the closed trinucleosome.

**Supplemental Figure 3: Representative FRET curves, and competition with H1 C-terminal tail deletion constructs.**

- a) Representative competition experiment between S31/30 (10 nM) and the indicated unlabeled nucleosome (0-500 nM) for H1<sub>1-121</sub> (1 nM). Curves were fit with *Eq. 4*.
- b) Representative competition curves between S31/30 (20 nM) and the indicated unlabeled nucleosome (0-500 nM) for H1<sub>1-96</sub> (1 nM). Curves were fit with *Eq. 4*.
- c and d) Representative (de)quenching isotherm of (c) LE-Tri (0-25 nM) or (d) NLE-Tri (0-25 nM) for H1<sub>1-121</sub> (0.1 nM). Data were fit with *Eq 3*.

**Supplemental Figure 4: Validation of NLE-Tri and LE-Tri saturation and H1 purification.**

- a) Representative (de)quenching curves of H1<sub>FL</sub> purified with the published method demonstrating the effect of prep age on H1<sub>FL</sub> affinity. Upper panel: bi-phasic nature of H1-nucleosome interaction after storage of H1 at 4<sup>0</sup>C for ~4 days. The gray curve is S30/30 (from figure 3b right). Lower panel: the bi-phasic curve (above) separated into 2 binding isotherms (lower and upper) fit with *eq 3*. *Lower portion (black) has a  $K_d$  of 0.022 +/- 0.0046 ( $R^2=0.901$ ); upper portion (dark gray) has a  $K_d$  of 3.32 +/- 0.87 ( $R^2=0.89$ ).*
- b) 15% polyacrylamide SDS PAGE of H1 derivatives using an improved purification method (Lanes 2-6), fluorescent image (top) and Imperial protein stain (bottom). Lanes 2-4 are the indicated H1 derivative which had previously been frozen. Lane 5: freshly made protein; lane 6: unlabeled H1<sub>FL</sub>. Degradation of H1<sub>FL</sub> occurs rapidly (in less than one week) at 4<sup>0</sup>C storage (lane 7); this is only seen when visualized by fluorescence.
- c) Sequences of all mono-nucleosome DNA fragments used in this study. Trinucleosomes sequences are 3 copies of S30/30.
- d) Trinucleosomes were analyzed for degree of saturation. EcoRI digestion of NLE-Tri (top) and LE-Tri (bottom); the absence of free 207 DNA indicates the trinucleosome is saturated. U: uncut, C: cut. Lane 1: uncut trinucleosome; lane 2: EcoRI-treated; lane 3: S30/30 nucleosome control; lane 4: S30/30 bp DNA.
- e) Analysis of trinucleosomes by analytical ultracentrifugation (AUC). Sedimentation coefficients ( $S_{(20,w)}$ ) for trinucleosome substrates. NLE-Tri = ~16S; LE-Tri = ~18S. Both trinucleosome

substrates were reconstituted with mouse histones and have a slightly different  $S_{50}$  compared to published results using *Xenopus laevis* histones <sup>1</sup>.

### **References**

- 1 Winkler, D. D., Luger, K. & Hieb, A. R. Quantifying Chromatin-Associated Interactions: The HI-FI System. *Methods Enzymol* **512**, 243-274, doi:B978-0-12-391940-3.00011-1 [pii] 10.1016/B978-0-12-391940-3.00011-1 (2012).

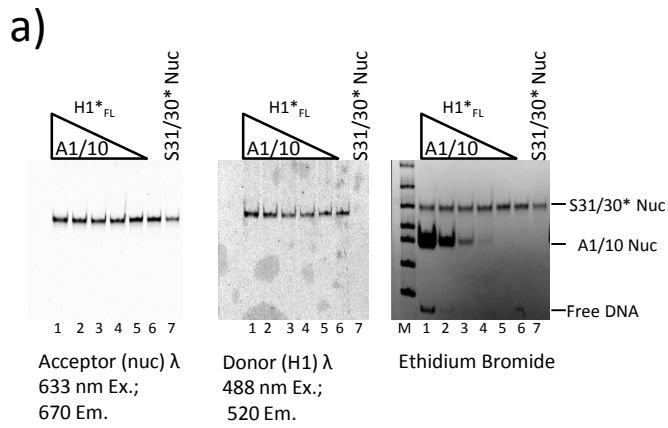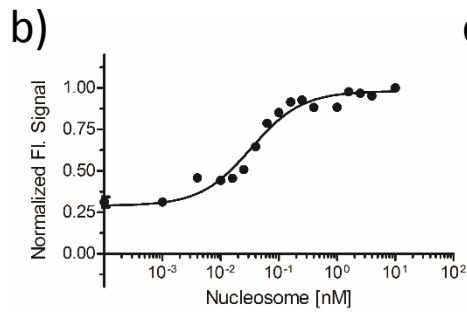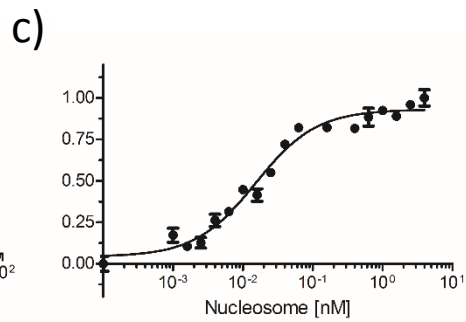

Supplementary Figure 1

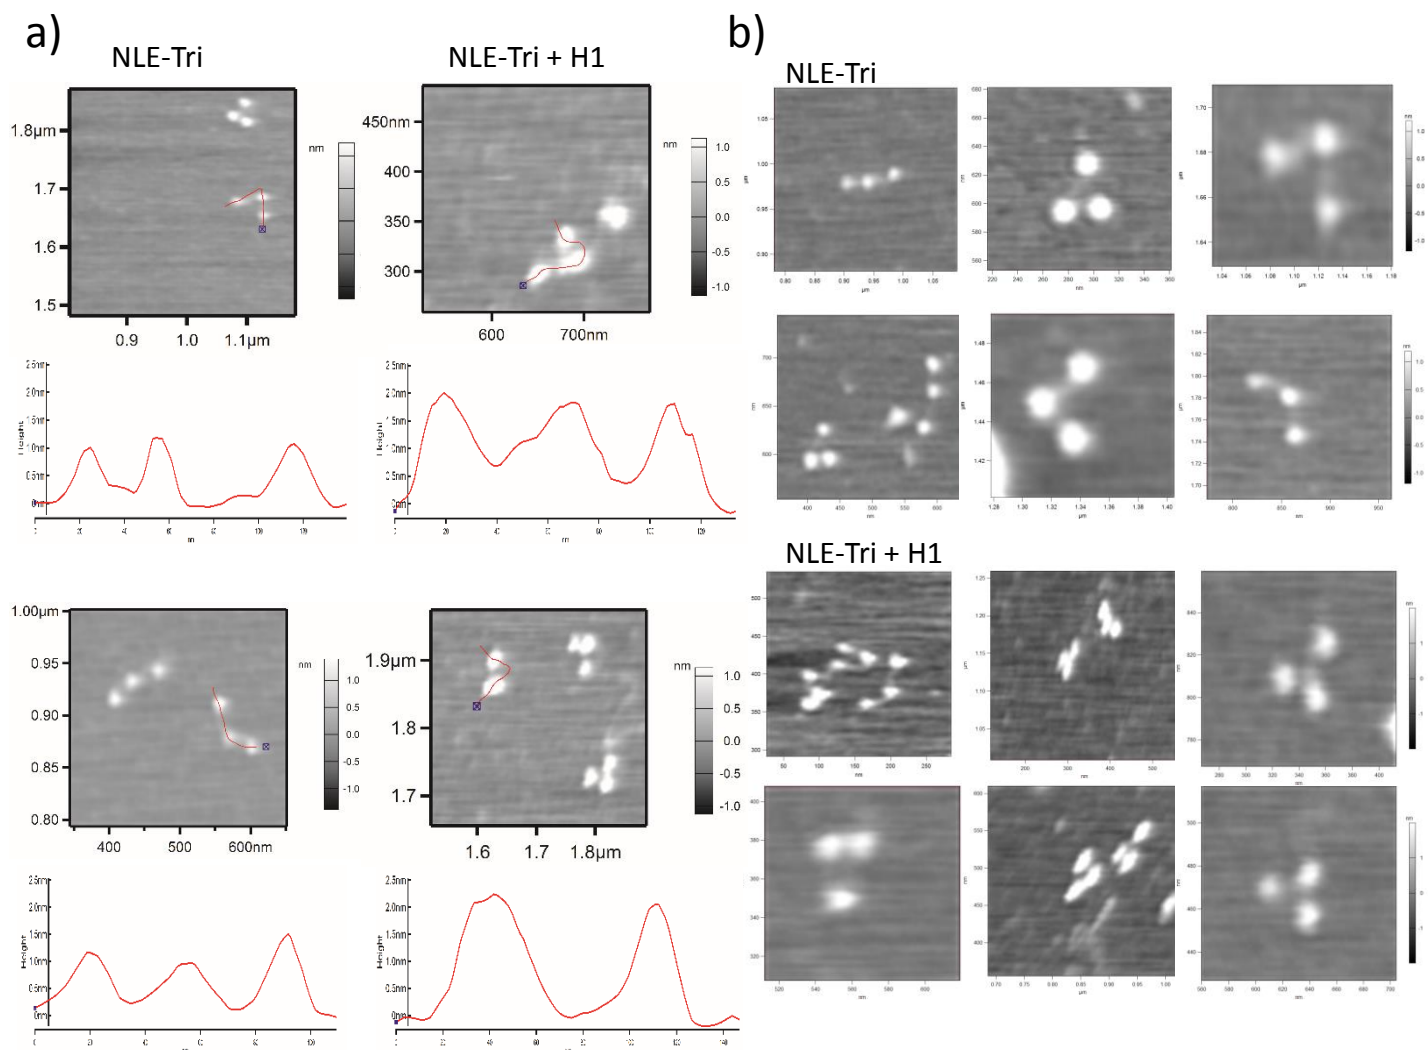

Supplementary Figure 2

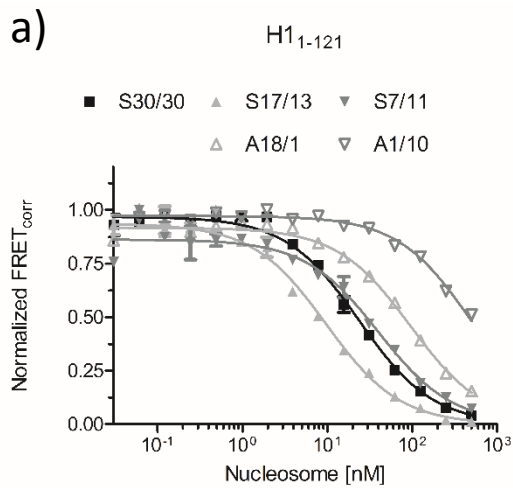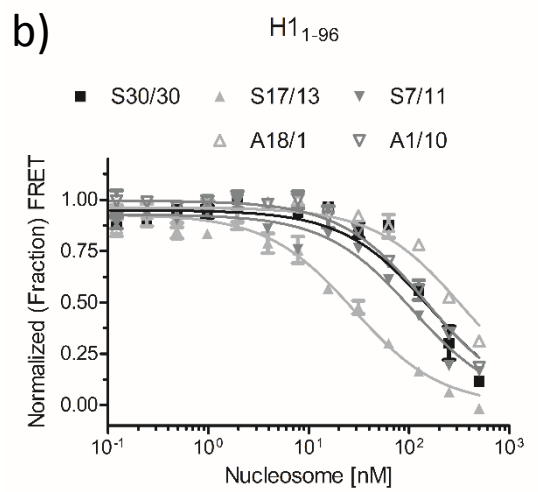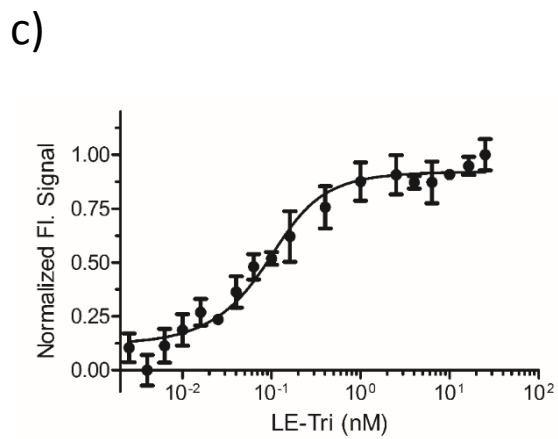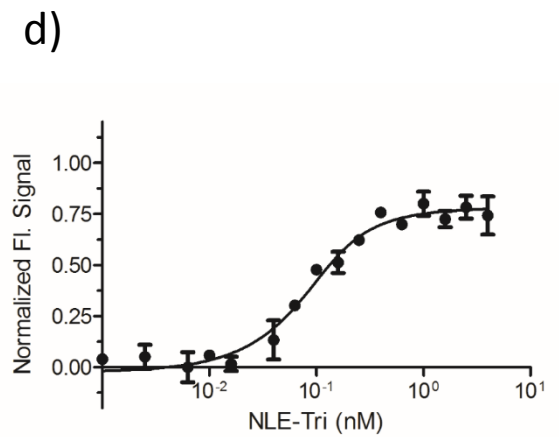

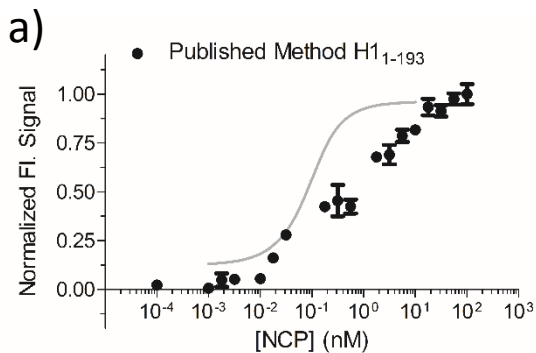

**c)**

```

S30/30      -ATCTAATACTAGGACCCCTATACGCGGCCGCATCGGAGAATCCCCGGTGCC
S31/30*    GATCTAATACTAGGACCCCTATACGCGGCCGCATCGGAGAATCCCCGGTGCC
A3/30*    -----CGCATCGGAGAATCCCCGGTGCC
S17/13     --TC-----G---GGATACGCGGCCGCCCTGGAGAATCCCCGGTGCC
A18/1     -ATC-----C---CTATACGCGGCCGCCCTGGAGAATCCCCGGTGCC
S7/11     ---C-----G-----AGCCAG-GCCTGAGAATC-CGGTGCC
A1/10     -----A---G-GCCTGAGAATC-CGGTGCC
NCP       -----G-GCCTGAGAATC-CGGTGCC
                *      *      *      *      *
    
```

```

S30/30      GAGGCCGCTCAATTGGTCGTAGACAGCTCTAGCACCCTTAAACGCACGT
S31/30*    GAGGCCGCTCAATTGGTCGTAGACAGCTCTAGCACCCTTAAACGCACGT
A3/30*    GAGGCCGCTCAATTGGTCGTAGACAGCTCTAGCACCCTTAAACGCACGT
S17/13     GAGGCCGCTCAATTGGTCGTAGACAGCTCTAGCACCCTTAAACGCACGT
A18/1     GAGGCCGCTCAATTGGTCGTAGACAGCTCTAGCACCCTTAAACGCACGT
S7/11     GAGGCCGCTCAATTGGTCGTAGACAGCTCTAGCACCCTTAAACGCACGT
A1/10     GAGGCCGCTCAATTGGTCGTAGACAGCTCTAGCACCCTTAAACGCACGT
NCP       GAGGCCGCTCAATTGGTCGTAGACAGCTCTAGCACCCTTAAACGCACGT
                *      *      *      *      *
    
```

```

S30/30      ACGCGCTGTCCCCCGCGTTTTAACCGCCAAGGGGATTACTCCCTAGTCTC
S31/30*    ACGCGCTGTCCCCCGCGTTTTAACCGCCAAGGGGATTACTCCCTAGTCTC
A3/30*    ACGCGCTGTCCCCCGCGTTTTAACCGCCAAGGGGATTACTCCCTAGTCTC
S17/13     ACGCGCTGTCCCCCGCGTTTTAACCGCCAAGGGGATTACTCCCTAGTCTC
A18/1     ACGCGCTGTCCCCCGCGTTTTAACCGCCAAGGGGATTACTCCCTAGTCTC
S7/11     ACGCGCTGTCCCCCGCGTTTTAACCGCCAAGGGGATTACTCCCTAGTCTC
A1/10     ACGCGCTGTCCCCCGCGTTTTAACCGCCAAGGGGATTACTCCCTAGTCTC
NCP       ACGCGCTGTCCCCCGCGTTTTAACCGCCAAGGGGATTACTCCCTAGTCTC
                *      *      *      *      *
    
```

```

S30/30      CAGGCACGTGTCAGATATATACATCGATTGCATGTGGATCCGAATTCATA
S31/30*    CAGGCACGTGTCAGATATATACATCGATTGCATGTGGATCCGAATTCATA
A3/30*    CAGGCACGTGTCAGATATATACATCGATTGCATGTGGATCCGAATTCATA
S17/13     CAGGCACGTGTCAGATATATACATCGATTGCATGTGGATCCGAATTCATA
A18/1     CAGGCACGTGTCAGATATATACATCGATTGCATGTGGATCCGAATTCATA
S7/11     CAGGCACGTGTCAGATATATACATCGATTGCATGTGGATCCGAATTCATA
A1/10     CAGGCACGTGTCAGATATATACATCGATTGCATGTGGATCCGAATTCATA
NCP       CAGGCACGTGTCAGATATATACATCGATTGCATGTGGATCCGAATTCATA
                *      *      *      *      *
    
```

```

S30/30      TTAATG-AT 207
S31/30*    TTAATG-AT 208
A3/30*    TTAATG-AT 180
S17/13     ----- 177
A18/1     ----- 166
S7/11     ----- 165
A1/10     ----- 158
NCP       ----- 147
    
```

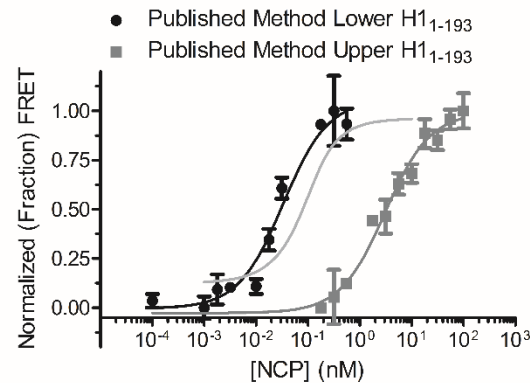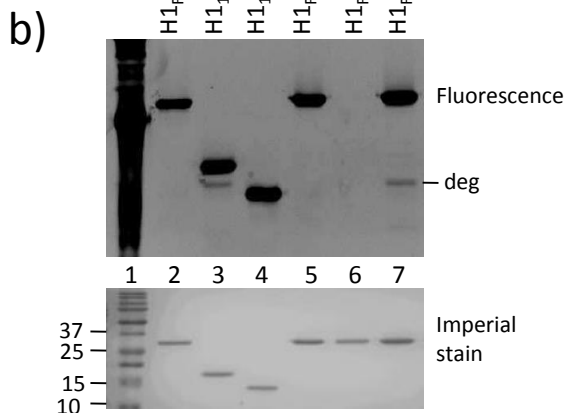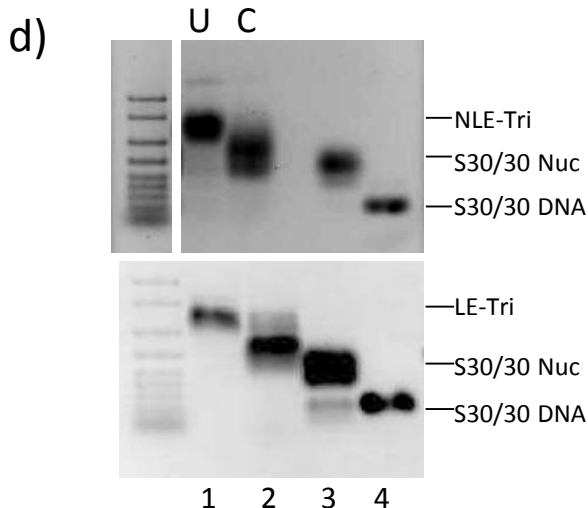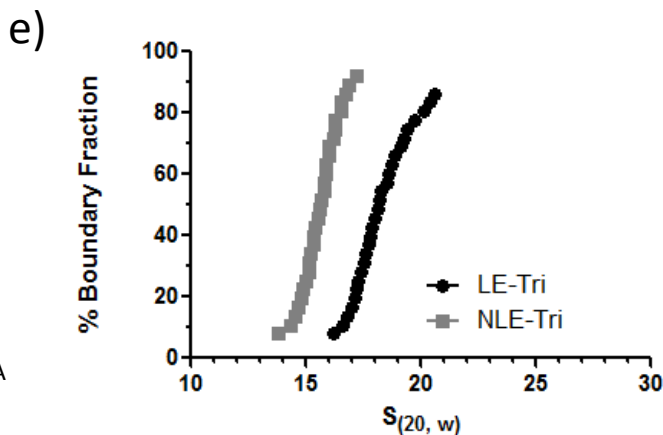

Supplementary Figure 4
